# Supplementary material
Source: PubMed Central journal article supplement (PMC5592682)

## Supplemental Data

### The K-Ras effector p38 $\gamma$ MAPK confers intrinsic resistance to tyrosine kinase inhibitors by stimulating *EGFR* transcription and EGFR de-phosphorylation

Ning Yin<sup>1#</sup>, Adrienne Lepp<sup>1#</sup>, Yongsheng Ji<sup>1#</sup>, Matthew Mortensen<sup>1</sup>, Songwang Hou<sup>1</sup>, Xiao-Mei Qi<sup>1</sup>, Charles R. Myers<sup>1</sup> and Guan Chen<sup>1,2\*</sup>

<sup>1</sup>Department of Pharmacology and Toxicology,

<sup>2</sup>Research Service, Zablocki Veterans Affairs Medical Center, Medical College of Wisconsin, Milwaukee, WI, USA

Corresponding to [gchen@mcw.edu](mailto:gchen@mcw.edu)

# contributed equally to the work

#### This PDF file contains:

Supplemental Experimental Procedures

#### Six Suppl. Figures

**Suppl. Figure S1.** Roles of K-Ras mutation and EGFR/Y1173 phosphorylation in resistance to TKIs.

**Suppl. Figure S2.** Roles of c-Jun and EGFR in resistance to TKIs downstream of p38 $\gamma$

**Suppl. Figure S3.** Nuclear co-localization of p38 $\gamma$  and c-Jun in K-Ras mutant cells and sensitization of K-Ras mutant cells to TKIs by c-Jun knockdown

**Suppl. Figure S4.** p38 $\gamma$  and PTPH1 knockdown sensitizes K-Ras mutant cells to TKI-induced growth inhibition

**Suppl. Figure S5.** Knockdown of PTPH1 fails to consistently affect the sensitivity of K-Ras WT cells to TKIs.

**Suppl. Figure S6.** PFD treatment increases the sensitivity of K-Ras mutant cancer cells to TKIs and disrupts the EGFR complexes with PTPH1 and p38 $\gamma$  proteins in K-Ras mutant tumors.

## SUPPLEMENTARY EXPERIMENTAL PROCEDURES

### Antibodies and other reagents

The antibody against PTPH1 (mouse) was kindly provided by Dr. N. K. Tonks (1). Other antibodies used in this study were purchased from Santa Cruz Biotechnology (Santa Cruz, CA). These include Anti-GAPDH (sc-47724), anti- $\beta$ -actin (sc-47778), anti-EGFR (mouse, sc-53274), anti-EGFR (rabbit, sc-03) anti-EGFR (goat, sc-03G), anti-p-EGFR/Y1173 (goat, sc-12351), anti-PTPH1 (goat, sc9789), anti- $\alpha$ -Actinin (sc-17829), anti-c-Jun (sc-44) and anti-Tubulin (sc-6199). Anti-p-EGFR/Y1173 (rabbit, 4407L) was obtained from Cell Signaling and anti-p38 $\gamma$  (AF1347) was from R&D Systems. The dual EGFR/Her2 inhibitor lapatinib (Lap) and the EGFR inhibitor gefitinib (Gef) were obtained Selleckem. Pirfenidone (PFD) for cell culture and animal studies was purchased from Sigma and Pirespa (Shionogi & Co.), respectively.

### Cell fractionation, immunoprecipitation, immunoblot analysis, and immune-staining

For cell fractionation analysis, our previously published protocol was used (2,3). For immunoprecipitation (IP), equal protein amounts were used for analysis, with aliquots of whole cell lysates (WCL) used as input controls. Briefly, cells were washed with cold PBS and lysed in modified RIPA buffer (50mM Tris-HCL, pH 7.5, 1mM phenylmethylsulfonyl fluoride, 1mM dithiothreitol, 10mM sodium fluoride, 1 $\mu$ g/ml aprotinin, 1 $\mu$ g/ml leupeptin, 1 $\mu$ g/ml pepstatin, and 1% NP-40) as described (2,3). Cleared lysates were then incubated with the indicated antibodies or IgG overnight at 4<sup>o</sup>C. Precipitates were then washed and pellets were re-suspended in 2X loading buffer. For direct Western blot (WB), cells were directly lysed in 1X loading buffer. After heating, samples were separated on SDS-PAGE and the rest of the procedure was the same as previously described (4). For immune-staining analysis, cells were plated on coverslips and fixed in 3.7% formaldehyde. Cells were then permeabilized in a buffer containing 0.5% Triton X-100 and 0.5% NP40, and then incubated with a blocking buffer (PBS containing 3% bovine serum) prior to immunostaining.

### Primers used for these studies

#### shRNA Target Sequences:

shLuc: GTGCGTTGCTAGTACCAAC;

shp38 $\gamma$ #1: CTCATGAAACATGAGAAGCTA;

shp38 $\gamma$ #2: GAAGGAGATCATGAAGGTGAC;

shc-Jun#1: TTAAGCTGTGCCACCTGTTCC;

shc-Jun#2: GGCACAGCTTAAACAGAAAGTC

shEGFR#1: GAGAACTCTGAGTGCATACAG

shEGFR#2: GCTCTCTTGAGGATCTTGAAG

Primers used in qRT-PCR:

EGFR rat forward: 5' CCCACAGCAAGGCTTCTTCA 3';

EGFR rat reverse: 5' CACGGCAGCTCCCATTCTA 3';

EGFR human forward: 5' CCACCAAATTAGCCTGGACA 3';

EGFR human reverse: 5' CGCGACCCTTAGGTATTCTG 3';

GAPDH forward: 5' GGTGGTCTCCTCTGACTTCAACA 3';

GAPDH reverse: 5' GTTGCTGTAGCCAAATTCGTTGT 3'

Primers used in the ChIP assay (the EGFR promoter region):

between -889/-785 containing 2 AP-1 sites,

EGFR promoter -889/-785 region forward: 5' AGAGGGTCCCGTAGTGCTG 3';

EGFR promoter -889/-785 region reverse: 5' AGACTGGCCCCTGGCATTCTCCT 3'

## References

1. Zhang, S.-H., Kobayashi, R., Graves, P. R., Piwnicka-Worms, H., and Tonks, N. K. (1997) Serine phosphorylation-dependent association of the band 4.1-related protein-tyrosine phosphatase PTPH1 with 14-3-3 $\beta$  protein. *J Biol Chem* **272**, 27281-27287
2. Zhi, H., Hou, S., Li, R., Basir, Z., Xiang, Q., Szabo, A., and Chen, G. (2011) PTPH1 cooperates with vitamin D receptor to stimulate breast cancer growth through their mutual stabilization. *Oncogene* **30**, 1706-1715
3. Ma, S., Yin, N., Qi, X., Pfister, S. L., Zhang, M., Ma, R., and Chen, G. (2015) Tyrosine dephosphorylation enhances the therapeutic target activity of epidermal growth factor receptor (EGFR) by disrupting its interaction with estrogen receptor (ER). *Oncotarget* **6**, 13320-13333
4. Qi, X., Tang, J., Loesch, M., Pohl, N., Alkan, S., and Chen, G. (2006) p38 $\gamma$  MAPK integrates signaling cross-talk between Ras and estrogen receptor to increase breast cancer invasion. *Cancer Res* **66**, 7540-7547
5. Shirasawa, S., Furuse, M., Yokoyama, N., and Sasazuki, T. (1993) Altered growth of human colon cancer cell lines disrupted at activated Ki-ras. *Science* **260**, 85-88
6. Qi, X., Tang, J., Pramanik, R., Schultz, R. M., Shirasawa, S., Sasazuki, T., Han, J., and Chen, G. (2004) p38 MAPK activation selectively induces cell death in K-ras mutated human colon cancer cells through regulation of vitamin D receptor. *J Biol Chem* **279**, 22138-22144
7. Hou, S., Padmanaban, S., Qi, X., Leep, A., Mirza, S., and Chen, G. (2012) p38 $\gamma$  MAPK signals through phosphorylating its phosphatase PTPH1 in regulating Ras oncogenesis and stress response. *J Biol Chem* **287**, 27895-27905
8. Qi, X. M., Xie, C., Hou, S., Li, G., Yin, N., Dong, L., Lepp, A., Chesnik, M. A., Mirza, S. P., Szabo, A., Tsai, S., Basir, Z., Wu, S., and Chen, G. (2014) Identification of a ternary protein-complex as a therapeutic target for K-Ras-dependent colon cancer. *Oncotarget* **5**, 4269-4282
9. Mologni, L., Dekhil, H., Ceccon, M., Purgante, S., Lan, C., Cleris, L., Magistroni, V., Formelli, F., and Gambacorti-Passerini, C. B. (2010) Colorectal tumors are effectively eradicated by combined inhibition of  $\beta$ -catenin, KRAS, and the oncogenic transcription factor ITF2. *Cancer Res* **70**, 7253-7263
10. Li, Q.-P., Qi, X., Pramanik, R., Pohl, N. M., Loesch, M., and Chen, G. (2007) Stress-induced c-Jun-dependent vitamin D receptor (VDR) activation dissects the non-classical VDR pathway from the classical VDR activity. *J Biol Chem* **282**, 1544-1551

## Suppl. Figures

**Suppl. Figure S1. Roles of K-Ras mutation and EGFR/Y1173 phosphorylation in resistance to TKIs.** **A.** Representative images of colony formation for Figs. 1A/B in K-Ras mutant and K-Ras-disrupted sublines (5-9). **B.** Expression of mutant K-Ras (G12V) in Hke3 cells confers TKI resistance in Hke3 cells (left, WB and right, relative colony formation over DMSO in K-Ras transduced cells, mean  $\pm$  SD, n = 3). **C.** representative colony images for Fig. 1E.

**Suppl. Figure S2. Roles of c-Jun and EGFR in resistance to TKIs downstream of p38 $\gamma$ .** **A-C.** c-Jun and EGFR were stably depleted from cells via lentiviral shRNA infection and engineered cells were analyzed for protein expression by WB (**A, B**), and for colony formation (**C**, mean  $\pm$  SD, n = 3) (10).

**Suppl. Figure S3. Nuclear co-localization of p38 $\gamma$  and c-Jun in K-Ras mutant cells and sensitization of K-Ras mutant cells to TKIs by c-Jun knockdown.** **A.** Immuno-fluorescence co-staining was performed as described (4) (scale bar = 100 $\mu$ m). **B.** Cells were depleted of c-Jun protein by lentiviral mediated shc-Jun (#1shRNA) delivery and the resultant cells were analyzed for growth inhibition by TKIs (the same conditions as Figure 1A). Results of 3 separate experiments are shown at left (mean  $\pm$  SD) with representative images of colony formation at bottom right. WB results (top, right panel) show c-Jun knockdown by shRNA.

**Suppl. Figure S4. p38 $\gamma$  and PTPH1 knockdown sensitizes K-Ras mutant cells to TKI-induced growth inhibition.** **A, B.** Cells were stably depleted of p38 $\gamma$  or PTPH1 by lentiviral shRNA infection. The resultant cells were assessed for protein expression (left top) and colony formation. Results of summarized colony formation are given in the bar graph (Mean  $\pm$  SD, n = 3) and representative colony images are presented at right.

**Suppl. Figure S5. Knockdown of PTPH1 fails to consistently affect the sensitivity of K-Ras WT cells to TKIs and p38 $\gamma$  and PTPH1 collaborate to regulate EGFR expression and de-phosphorylation.** **A, B.** PTPH1 stable knockdown cells (from Fig. 5A) were analyzed for growth-inhibition by TKIs (the same conditions as in Fig. 1A). Mean  $\pm$  SD of 3 experiments are presented in **A** and representative images of colony formation are shown in **B**.

**Suppl. Figure S6. PFD treatment increases the sensitivity of K-Ras mutant cancer cells to TKIs and disrupts the EGFR complexes with PTPH1 and p38 $\gamma$  proteins in K-Ras mutant tumors.** **A.** Cells were treated for about 2 weeks and colonies formed were stained and photographed (for Fig. 6A). **B.** Protein lysates were prepared from tumors growing in nude mice treated with PFD  $\pm$  Lap (Fig. 6C), which were then analyzed by WB. Results (left) are from 3 tumors from 3 separate mice treated with PFD or control DMSO for decreased p38 $\gamma$  activity (reduced p-PTPH1 levels) (7,8). Equal protein amounts from the indicated tumor lysates were immune-precipitated with specific anti-EGFR antibody or control IgG and precipitates were analyzed for PTPH1 and p38 $\gamma$  by WB. The numbers indicate EGFR-bound PTPH1 or p38 $\gamma$  measured from EGFR precipitates.

**Figure S1**

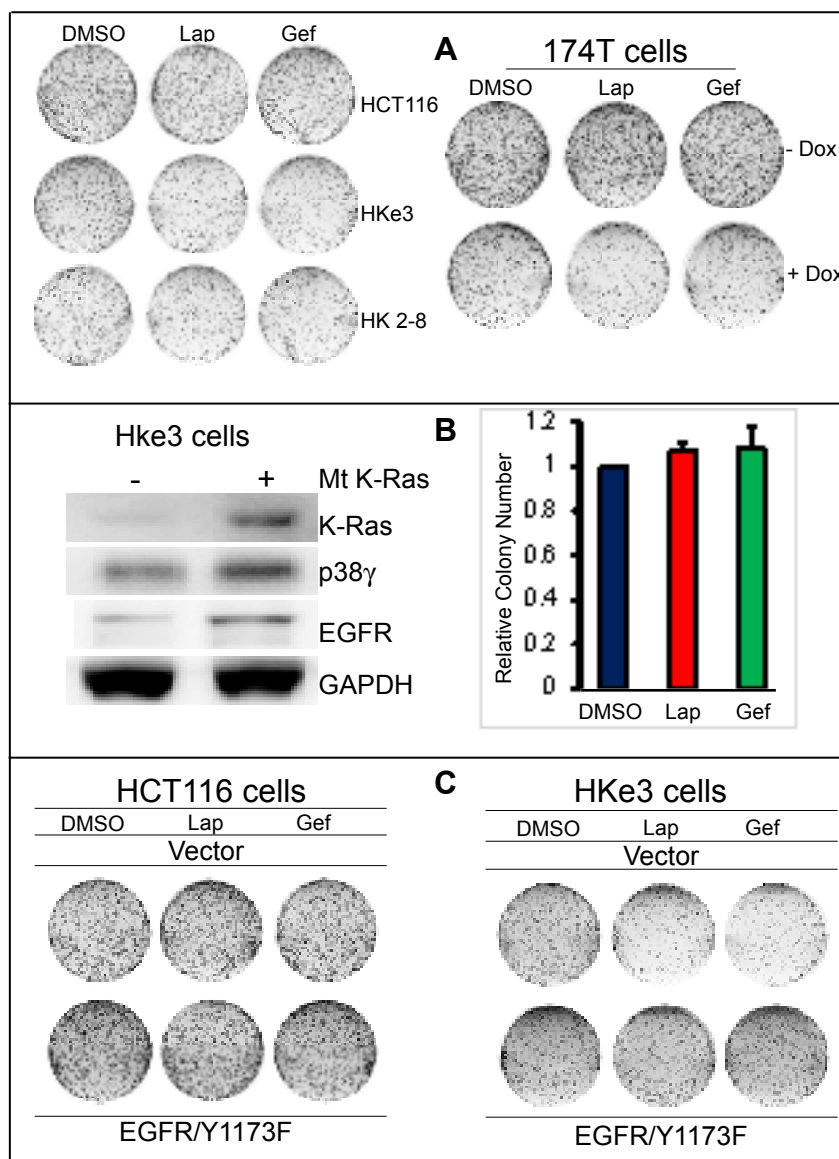

**Figure S2**

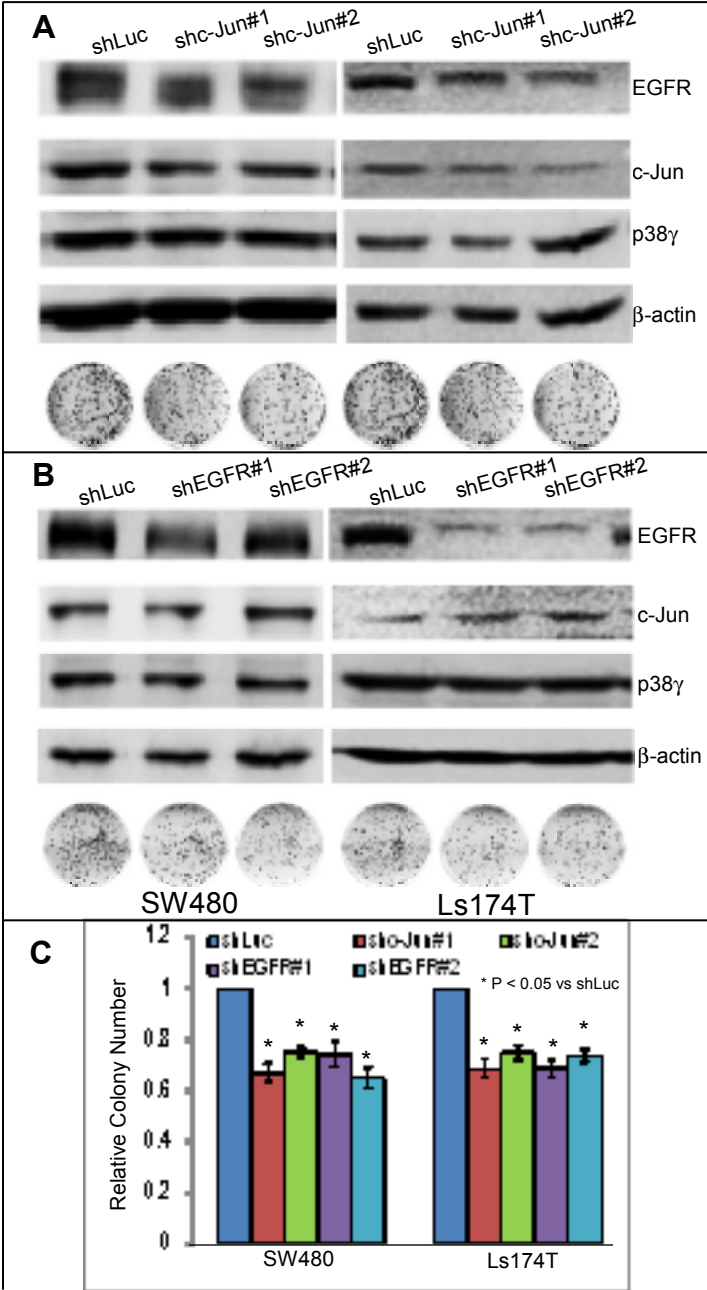



**Figure S3**

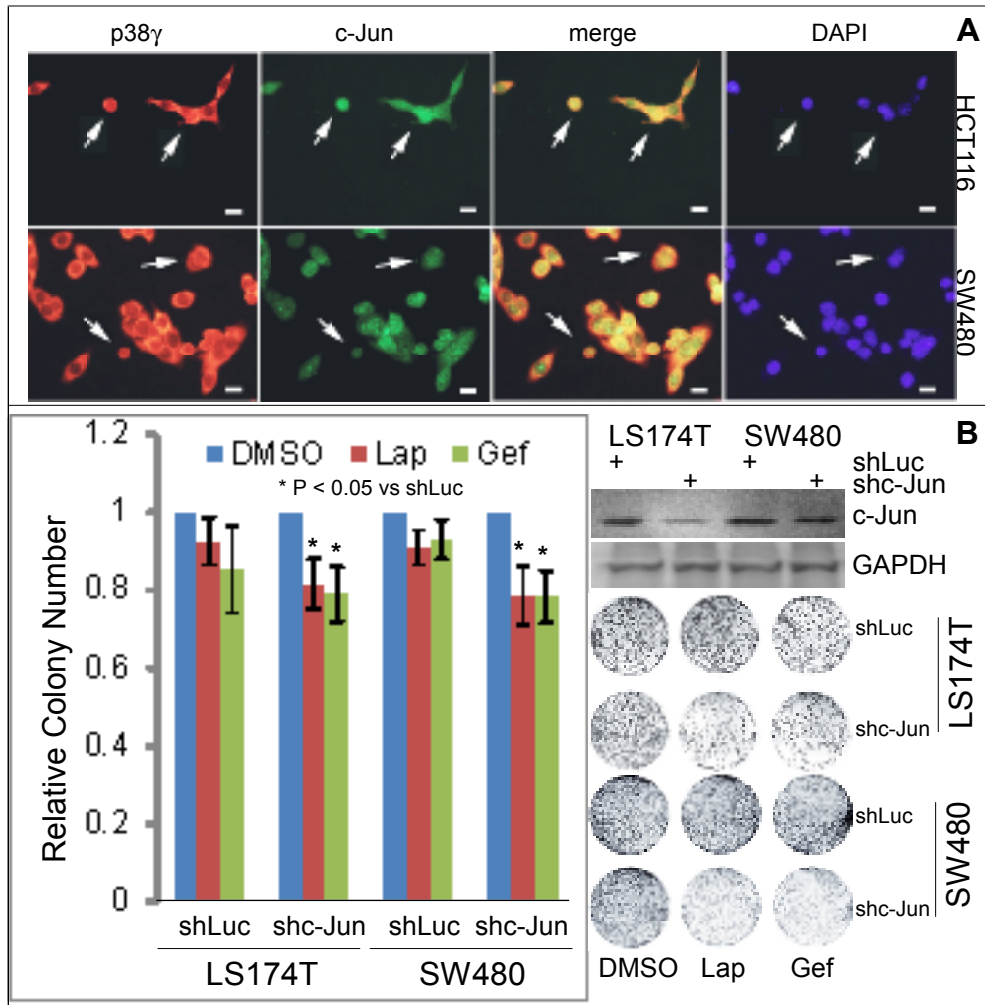

**Figure S4**

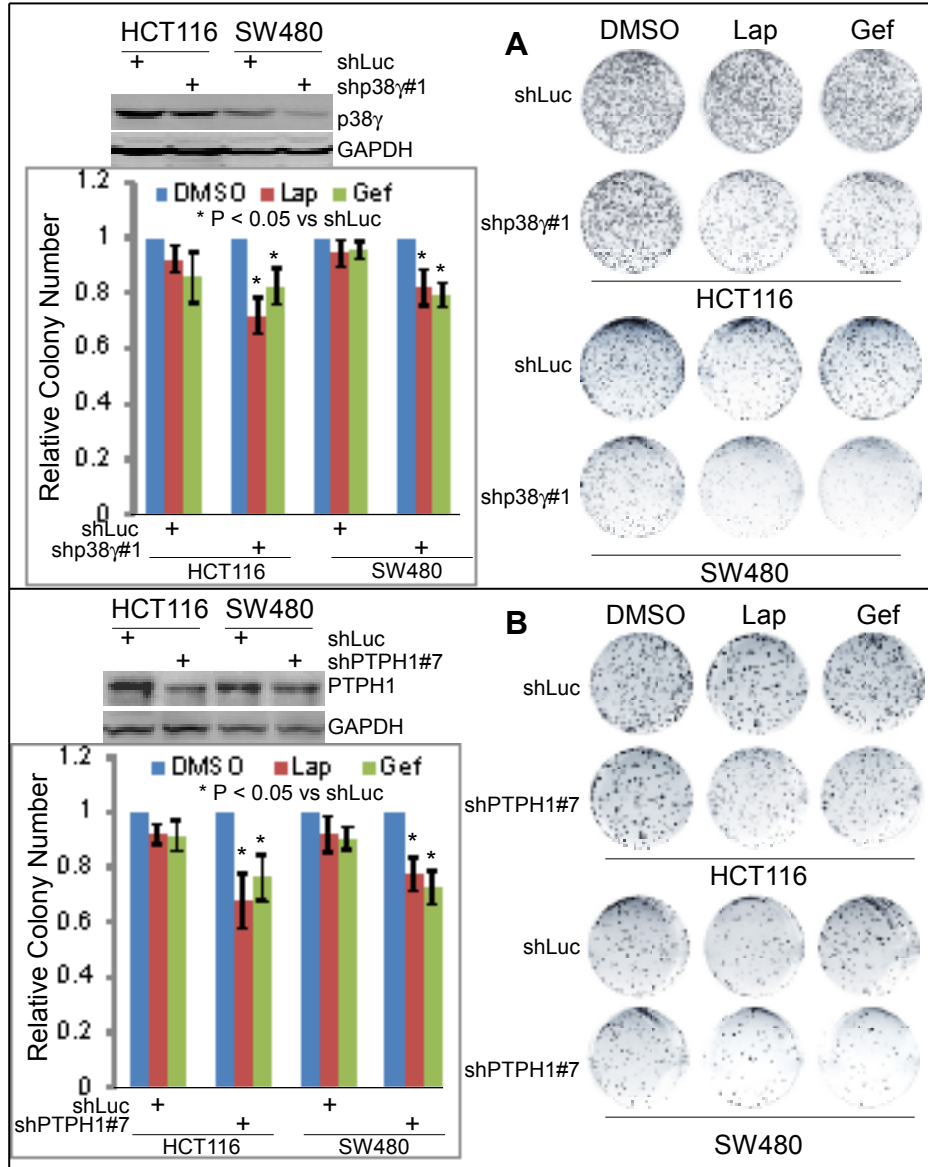

**Figure S5**

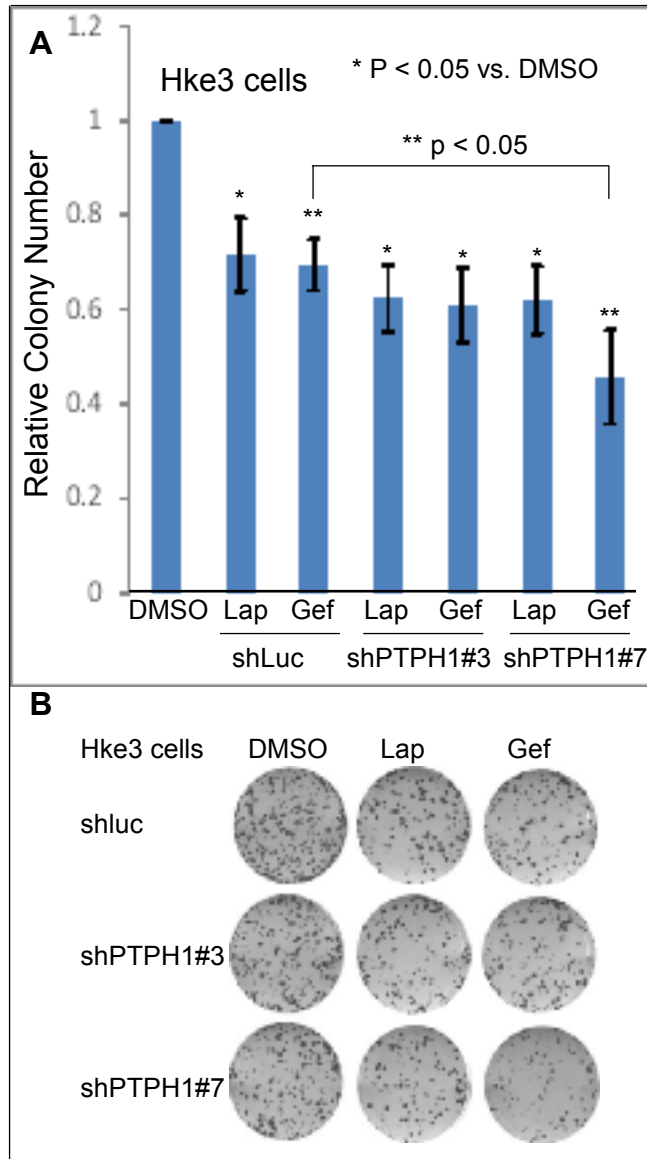

**Figure S6**

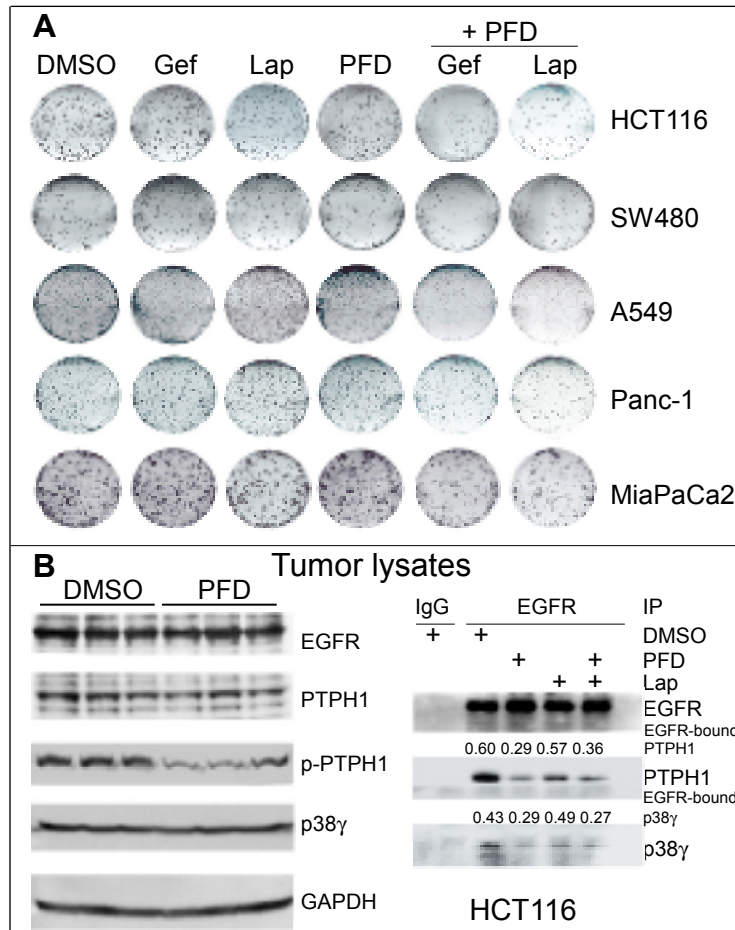

Supplement: 10.1074_M117.779488_jbc.M117.779488-1.pdf [file 10.1074_M117.779488_jbc.M117.779488-1.pdf]
